# Supplementary material for: Salivary Biomarkers for Oral Cancer Detection: An Exploratory Systematic Review
Source: MDPI journal article supplement (doi:10.3390/ijms25052634), 2024-02-23
Supplement: s1 [file s1]

## Search strategy for each database

### **WOS**

(((((ALL=(saliva)) AND ALL=(diagnosis)) AND ALL=(biomarker)) AND ALL=(oral cancer)) OR ALL=(head and neck cancer)) OR ALL=(premalignant lesion))

### **Scopus**

saliva AND biomarker AND diagnosis AND oral AND cancer OR head AND neck AND cancer OR premalignant AND lesion

### **Pubmed (Medline)**

(((((Saliva) AND (diagnosis)) AND (biomarkers)) AND (mouth neoplasm)) OR (head and neck neoplasm)) OR (precancerous condition)

### **Ebsco**

saliva AND diagnosis AND biomarker AND precancerous lesion OR oral cancer OR (head and neck cancer )
