# Supplementary material for: Salivary Biomarkers for Oral Cancer Detection: An Exploratory Systematic Review
Source: MDPI journal article supplement (doi:10.3390/ijms25052634), 2024-02-23
Supplement: s1 [file s1]

**Supplementary Table S1.** Biomarkers and disorders analyzed by the different studies included in this review.

| Reference | Groups                                  | Sample size | Biomarkers        |
|-----------|-----------------------------------------|-------------|-------------------|
| [44]      | OSCC (20)<br>OPMD (60)<br>CONTROLS (20) | 100         | miR-21            |
|           |                                         |             | miR-184           |
|           |                                         |             | miR-145           |
| [43]      | OPDM (46)<br>CONTROLS (24)              | 68          | miR-21            |
|           |                                         |             | miR-31            |
| [50]      | OSCC (50)<br>CONTROLS (50)              | 100         | Cyfra-21          |
| [30]      | OSCC (54)<br>CONTROLS (31)              | 85          | SAT mRNA          |
|           |                                         |             | OAZ mRNA          |
|           |                                         |             | IL-1 $\beta$ mRNA |
|           |                                         |             | IL-8 mRNA         |
| [31]      | OSCC(58)<br>OPMD (47)<br>CONTROLS (42)  | 117         | IL-1 $\beta$      |
|           |                                         |             | IL-8              |
|           |                                         |             | LGALS3BP          |
| [40]      | OSCC (150)<br>CONTROLS (80)             | 230         | miR-let-7a-5p     |
|           |                                         |             | miR-3928          |
|           |                                         |             | miR-7703          |
|           |                                         |             | miR345-5p         |
|           |                                         |             | miR1470           |

|      |                                         |    |                    |
|------|-----------------------------------------|----|--------------------|
| [52] | OSCC (20)<br>CONTROLS (20)              | 40 | CD44               |
| [34] | OSCC (30)<br>OPMD (30)<br>CONTROLS (30) | 90 | TNF- $\alpha$      |
| [16] | OSCC (30)<br>OPMD (9)<br>CONTROLS (25)  | 64 | CYFRA 21-1         |
|      |                                         |    | LDH                |
|      |                                         |    | Amylase            |
| [53] | OSCC (30)<br>CONTROLS (33)              | 63 | IL-4               |
|      |                                         |    | IL-10              |
|      |                                         |    | IL-13              |
|      |                                         |    | IL-1RA             |
| [35] | OPMD (10)<br>OSCC (15)<br>CONTROLS (15) | 35 | GPx                |
|      |                                         |    | MDA                |
|      |                                         |    | TNF- $\alpha$      |
|      |                                         |    | AFP                |
| [54] | OSCC (78)                               | 78 | Transgeline mRNA   |
| [18] | OSCC (25)<br>OPMD (25)<br>CONTROLS (10) | 60 | LDH                |
| [27] | OSCC (31)<br>CONTROLS (59)              | 90 | H3F3A mRNA         |
|      |                                         |    | IL-8 mRNA          |
|      |                                         |    | IL-1 $\beta$ mRNA  |
|      |                                         |    | DUSP1 mRNA         |
|      |                                         |    | OAZ1 mRNA          |
|      |                                         |    | SAT1 mRNA          |
|      |                                         |    | S100P mRNA         |
|      |                                         |    | TNF- $\alpha$ mRNA |
|      |                                         |    | IL-6 mRNA          |

|      |                                         |     |                                     |
|------|-----------------------------------------|-----|-------------------------------------|
| [55] | OSCC (16)<br>CONTROLS (5)               | 21  | N-glycan                            |
| [45] | OSCC (14)<br>CONTROLS (10)              | 24  | TSA                                 |
| [49] | OSCC (25)<br>CONTROLS (25)              | 50  | miR139-5p                           |
| [17] | OSCC (24)<br><br>CONTROLS (24)          | 48  | ADAM9                               |
|      |                                         |     | Cathepsin V                         |
|      |                                         |     | Kallikrein 5                        |
|      |                                         |     | Kallikrein 7                        |
| [41] | OSCC (21)<br>CONTROLS (11)              | 32  | miR- 412-3p                         |
|      |                                         |     | miR-512-3p                          |
|      |                                         |     | miR-302b-3p                         |
|      |                                         |     | miR-517b-3p                         |
| [15] | OSCC (15)<br>OPMD (15)<br>CONTROLS (15) | 45  | Chemerin                            |
|      |                                         |     | MMP-9                               |
| [56] | OSCC (30)<br>OPMD (30)<br>CONTROLS (40) | 100 | Vitamin C                           |
| [46] | OPMD (42)<br>OSCC (10)                  | 52  | Ornithine                           |
|      |                                         |     | Carnitine                           |
|      |                                         |     | Arginine                            |
|      |                                         |     | o- Hydroxybenzoate                  |
|      |                                         |     | N-acetylglucosamine -1<br>phosphate |
|      |                                         |     | Ornithine                           |
| [47] | OSCC (20)<br>OPMD (20)                  | 60  | TSA                                 |

|      |                                          |     |               |
|------|------------------------------------------|-----|---------------|
| [47] | OSCC (30)<br>CONTROLS (30)<br>OPMD (60)  | 120 | LDH           |
| [28] | OPMD (35)<br>CONTROLS (35)               | 105 | IL-6          |
|      |                                          |     | IL-8          |
| [19] | OSCC (86)<br>CONTROLS (35)               | 111 | AKR1B10       |
| [13] | OPMD (58)<br>CONTROLS (65)               | 123 | MMP-2         |
|      |                                          |     | MMP-8         |
|      |                                          |     | MMP-9         |
|      |                                          |     | TIMP-1        |
|      |                                          |     | TIMP-2        |
| [29] | CONTROLS (24)<br>OSCC (41)               | 65  | Eotaxin       |
|      |                                          |     | IFN- $\gamma$ |
|      |                                          |     | IL-1 $\beta$  |
|      |                                          |     | IL-6          |
|      |                                          |     | IL-8          |
|      |                                          |     | MIP-1b        |
|      |                                          |     | GRO           |
|      |                                          |     | TNF- $\alpha$ |
|      |                                          |     | Eotaxin       |
| [23] | OSCC (26)<br>CONTROLS (10)               | 36  | ErbB2         |
|      |                                          |     | CEA           |
|      |                                          |     | Survivin      |
| [48] | OSCC (101)<br>OPMD (58)<br>CONTROLS (35) | 194 | Glycine       |
|      |                                          |     | Proline       |
| [57] | CONTROLS (20)<br>OPMD (20)<br>OSCC (20)  | 60  | CRP           |

|      |                                          |     |               |
|------|------------------------------------------|-----|---------------|
| [58] | OSCC (33)<br>CONTROLS (34)               | 67  | NAB2 mRNA     |
|      |                                          |     | CYP27A1 mRNA  |
|      |                                          |     | MAOB mRNA     |
|      |                                          |     | SIAE mRNA     |
|      |                                          |     | COL3A1 mRNA   |
|      |                                          |     | NPIP4 mRNA    |
| [59] | OSCC (30)<br>CONTROLS (30)               | 60  | MMP-9         |
| [24] | OSCC (30)<br>OPMD (10)<br>CONTROLS (10)  | 50  | CD44v         |
|      |                                          |     | SYNE1         |
|      |                                          |     | miR-34a       |
| [22] | OSCC (27)<br>CONTROLS (26)               | 53  | ErbB2         |
|      |                                          |     | CEA           |
| [21] | OSCC (32)<br>CONTROLS (37)               | 69  | LDH           |
| [60] | OSCC (30)<br>OPMD (30)<br>CONTROLS (30)  | 90  | S100A2        |
|      |                                          |     | SLC3A2        |
|      |                                          |     | IL1RN         |
| [61] | OSCC (116)<br>CONTROLS(65)               | 181 | KPNA2         |
| [51] | OSCC (63)<br>CONTROLS (60)<br>OPMD (21)  | 123 | EGFR          |
| [25] | OSCC (112)<br>OPMD (30)<br>CONTROLS (60) | 202 | Naa10p        |
|      |                                          |     | CEA           |
| [32] | OSCC (21)                                | 21  | IL-1 $\beta$  |
|      |                                          |     | IP-10         |
|      |                                          |     | MIP-1 $\beta$ |
|      |                                          |     | VEGF          |

|      |                                         |    |               |
|------|-----------------------------------------|----|---------------|
|      |                                         |    | IL-6          |
|      |                                         |    | IFN- $\gamma$ |
|      |                                         |    | IL-5          |
|      |                                         |    | IL-8          |
| [62] | OSCC (30)<br>OPMD (25)<br>CONTROLS (30) | 85 | L-Fructose    |
| [63] | OSCC (30)<br>OPMD (25)<br>CONTROLS (30) | 35 | CYFRA21-1     |
| [33] | OSCC (71)                               | 71 | IL-17A        |
|      |                                         |    | IL-17F        |
|      |                                         |    | TNF- $\alpha$ |
| [64] | OSCC (30)<br>CONTROLS (30)              | 60 | MMP-1         |
|      |                                         |    | PADI1         |
|      |                                         |    | TNC           |
|      |                                         |    | CSTA          |
|      |                                         |    | MMP-3         |
| [36] | OSCC (16)<br>CONTROLS (8)               | 24 | ANG           |
|      |                                         |    | ANG2          |
|      |                                         |    | HGF           |
|      |                                         |    | PIGF          |
|      |                                         |    | VEGF          |
|      |                                         |    | MMP-1         |
|      |                                         |    | MMP-2         |
|      |                                         |    | MMP-3         |
|      |                                         |    | MMP-8         |
|      |                                         |    | TIMP-1        |
|      |                                         |    | TIMP-2        |
| [38] |                                         | 96 | PBSA          |

|      |                                                       |     |                         |
|------|-------------------------------------------------------|-----|-------------------------|
|      | OSCC (32)<br>TOBACCO<br>CHEWERS (32)<br>CONTROLS (32) |     | FSA                     |
| [42] | OSCC (49)<br>CONTROLS (14)                            | 63  | miR-24-3p               |
| [65] | OSCC (25)<br>OPMD (25)<br>CONTROLS (25)               | 75  | $\beta$ 2-microglobulin |
| [66] | OSCC (60)<br>CONTROLS (20)                            | 80  | Cathepsin B             |
| [37] | OSCC (41)<br>CONTROLS (10)                            | 51  | NUS1                    |
|      |                                                       |     | RCN1                    |
| [67] | OSCC (15)<br>OPMD (15)<br>CONTROLS (15)               | 45  | CD44                    |
|      |                                                       |     | S100A7                  |
|      |                                                       |     | S100P                   |
| [68] | OSCC (153)                                            | 153 | MMP-13                  |
| [14] | OSCC (24)<br>OPMD (42)<br>CONTROLS (22)               | 88  | MMP-9                   |
| [69] | OSCC (30)<br>OPMD (30)<br>CONTROLS (30)               | 90  | 8-OHdG                  |
| [70] | OSCC (33)<br>CONTROLS (12)                            | 45  | miR-30c-5p              |
| [71] | OSCC (20)<br>OPMD (40)<br>CONTROLS (20)               | 80  | KLK5                    |
| [26] | OSCC (66)<br>OPMD(66)<br>CONTROLS (20)                | 152 | IL-1 $\alpha$           |
|      |                                                       |     | IL-6                    |
|      |                                                       |     | IL-8                    |

|      |                                                                    |     |               |
|------|--------------------------------------------------------------------|-----|---------------|
|      |                                                                    |     | IP-10         |
|      |                                                                    |     | MCP-1         |
|      |                                                                    |     | TNF- $\alpha$ |
|      |                                                                    |     | HCC-1         |
|      |                                                                    |     | PF-4          |
| [72] | OSCC (25)<br>OPMD(25)<br>CONTROLS (25)                             | 75  | LDH           |
| [20] | OSSC (30)<br>OSMF (30)<br>CONTROLS (30)<br>TOBACCO<br>CHEWERS (30) | 120 | LDH           |

OSCC = oral squamous cell carcinoma; OPMD = oral potentially malignant disorder; OSMF = oral submucous fibrosis, .



**Supplementary Table S2.** Main findings from each study.

| Reference | Molecule      | Expression     | AUC   | P value  | Sens | Spec |
|-----------|---------------|----------------|-------|----------|------|------|
| [44]      | miR-21        | ↑ OSCC, ↑ OPMD | -     | p<0.001  | -    | -    |
|           | miR-184       | ↑ OSCC, ↑ OPMD | -     | p<0.001  | -    | -    |
|           | miR-145       | ↓ OSCC, ↓ OPMD | -     | -        | -    | -    |
| [43]      | miR-21        | ↑ OSCC, ↑ OPMD | -     | p=0.003  | -    | -    |
|           | miR-31        | ↑ OSCC, ↑ OPMD | -     | p<0.001  | -    | -    |
| [50]      | CYFRA-21      | ↑ OSCC         | -     | p<0.003  | 88%  | 78%  |
| [30]      | SAT mRNA      | ↑ OSCC         | 0.799 | p=0.002  | -    | -    |
|           | OAZ mRNA      | ↑ OSCC         | 0.799 | p=0.002  | -    | -    |
|           | IL-1β mRNA    | ↑ OSCC         | 0.799 | p=0.002  | -    | -    |
|           | IL-8 mRNA     | ↑ OSCC         | 0.799 | p=0.002  | -    | -    |
| [31]      | IL-1β         | ↑ OSCC         | 0.9   | p<0.05   | -    | -    |
|           | IL-8          | ↑ OSCC         | 0.9   | p<0.05   | -    | -    |
|           | LGALS3BP      | ↑ OSCC, ↑ OPMD | 0,76  | p<0.05   | -    | -    |
| [40]      | miR-let-7a-5p | ↑ OSCC         | 0.85  | -        | -    | -    |
|           | miR-3928      | ↑ OSCC         | 0.074 | -        | -    | -    |
|           | miR-7703      | -              | -     | -        | -    | -    |
|           | miR-345-5p    | -              | -     | -        | -    | -    |
|           | miR-1470      | -              | -     | -        | -    | -    |
| [52]      | CD44          | -              | -     | P=0.06   | -    | -    |
| [34]      | TNF-a         | ↑ OSCC, ↑ OPMD | -     | p<0.001  | 95%  | 96%  |
| [16]      | CYFRA 21-1    | ↑ OSCC, ↑ OPMD | 0.994 | -        | 90%  | 97%  |
|           | LDH           | ↑ OSCC, ↑ OPMD | -     | p<0.0005 | -    | -    |
|           | AMILASE       | ↑ OSCC, ↑ OPMD | -     | p<0.0005 | -    | -    |
| [53]      | IL-4          | ↑ OSCC         | -     | p=0.589  | -    | -    |
|           | IL-10         | ↑ OSCC         | -     | p=0.004  | -    | -    |
|           | IL-13         | ↑ OSCC         | -     | p=0.01   | -    | -    |

|      |                    |                |       |          |      |     |
|------|--------------------|----------------|-------|----------|------|-----|
|      | IL-1RA             | ↑ OSCC         | -     | p=0.96   | -    | -   |
| [35] | GPx                | ↑ OSCC         | -     | p <0.05  | -    | -   |
|      | MDA                | ↑ OSCC         | -     | p <0.05  | -    | -   |
|      | TNF- $\alpha$      | ↑ OSCC         | -     | p <0.05  | -    | -   |
|      | AFP                | ↑ OSCC         | -     | p <0.05  | -    | -   |
| [54] | Transgeline mRNA   | ↑ OSCC         | -     | p<0.01   | -    | -   |
| [14] | MMP9               | ↑ OSCC, ↑ OPMD | -     | p<0.001  | 100% | 54% |
| [18] | LDH                | ↑ OSCC         | -     | p<0.0009 | -    | -   |
| [27] | H3F3A mRNA         | -              | 0.66  | p=0.0424 | 68%  | 35% |
|      | IL-8 mRNA          | ↑ OSCC         | 0.43  | p=4489   | 100% | 87% |
|      | IL-1 $\beta$ mRNA  | -              | 0.6   | p=0.1903 | 48%  | 20% |
|      | DUSP1 mRNA         | ↑ OSCC         | 0.71  | p=0.002  | 65%  | 23% |
|      | OAZ1 mRNA          | ↑ OSCC         | 0.72  | p=0.0035 | 85%  | 41% |
|      | SAT1 mRNA          | ↑ OSCC         | 0.56  | p=0.43   | 52%  | 27% |
|      | S100P mRNA         | ↑ OSCC         | 0.58  | p=0.3228 | 64%  | 39% |
|      | TNF- $\alpha$ mRNA | ↑ OSCC         | 0.968 | -        | -    | -   |
|      | IL-6 mRNA          | ↑ OSCC         | 0.75  | -        | 63%  | 10% |
| [55] | N-glycans          | ↑ OSCC         | -     | -        | -    | -   |
| [45] | Sialic acid        | ↑ OSCC         | -     | p<0.01   | -    | -   |
| [49] | miR-139-5p         | ↓ OSCC         | 0.8   | p<0.006  | -    | -   |
| [17] | ADAM9              | ↑ OSCC         | 0.7   | -        | -    | -   |
|      | Cathepsin V        | ↑ OSCC         | 0.7   | -        | -    | -   |
|      | Kallikrein 5       | ↑ OSCC         | 0.7   | -        | -    | -   |
|      | Kallikrein 7       | ↑ OSCC         | 0.7   | -        | -    | -   |
| [41] | miR- 412-3p        | ↑ OSCC         | 0.871 | -        | -    | -   |
|      | miR-512-3p         | ↑ OSCC         | 0.847 | -        | -    | -   |
|      | miR-302b-3p        | ↑ OSCC         | 0.847 | -        | -    | -   |
|      | miR-517b-3p        | ↑ OSCC         | 0.847 | -        | -    | -   |
| [15] | Chemerin           | ↑ OSCC, ↑ OPMD | -     | -        | 93%  | 80% |
|      | MMP-9              | ↑ OSCC, ↑ OPMD | -     | -        | 100% | 93% |

|      |                                     |                |       |          |       |      |
|------|-------------------------------------|----------------|-------|----------|-------|------|
| [56] | Vitamin C                           | ↓ OSCC         | -     | -        | -     | -    |
| [46] | Ornithine                           | ↓ OSCC, ↓ OPMD | 0.676 | p<0.039  | -     | -    |
|      | Carnitine                           | ↓ OSCC, ↓ OPMD | 0.704 | p<0.035  | -     | -    |
|      | Arginine                            | ↓ OSCC, ↓ OPMD | 0.689 | p<0.015  | -     | -    |
|      | o- Hydroxybenzoate                  | ↓ OSCC, ↓ OPMD | 0.635 | p<0.045  | -     | -    |
|      | N-acetylglucosamine<br>-1 phosphate | ↓ OSCC, ↓ OPMD | 0.685 | 0.016    | -     | -    |
|      | R5P                                 | ↓ OSCC, ↓ OPMD | 0.714 | 0.007    | -     | -    |
| [47] | TSA                                 | ↑ OSCC         | -     | p<0.01   | -     | -    |
| [20] | LDH                                 | ↑ OSCC         | -     | p<0.001  | -     | -    |
| [28] | IL-6                                | ↓ OSCC         | -     | p<0.001  | -     | -    |
|      | IL-8                                | ↑ OSCC         | -     | p<0.0001 | -     | -    |
| [19] | AKR1B10                             | ↑ OSCC         | -     | p>0.01   | -     | -    |
| [13] | MMP-2                               | ↑ OSCC, ↑ OPMD | -     | p=0.02   | 99%   | 86%  |
|      | MMP-9                               | ↑ OSCC, ↑ OPMD | -     | p=0.05   | 83%   | 50%  |
|      | MMP-8                               | ↑ OSCC, ↑ OPMD | -     | p=0.05   | 83%   | 67%  |
|      | TIMP-1                              | ↑ OSCC, ↑ OPMD | -     | p=0.09   | 67%   | 80%  |
|      | TIMP-2                              | ↑ OSCC, ↑ OPMD | -     | p=0.1    | 67%   | 8%   |
| [29] | Eotaxin                             | ↑ OSCC         | 0.662 | p=0.030  | 71%   | 3%   |
|      | IFN-γ                               | ↑ OSCC         | 0.657 | p=0.036  | 80.0% | 50%  |
|      | IL-1β                               | ↑ OSCC         | 0.729 | p=0.002  | 61%   | 79%  |
|      | IL-6                                | ↑ OSCC         | 0.823 | p<0.001  | 83%   | 71%  |
|      | IL-8                                | ↑ OSCC         | 0.783 | p=0.001  | 66%   | 79%  |
|      | MIP-1b                              | ↑ OSCC         | 0.681 | p=0.016  | 58%   | 79%  |
|      | GRO                                 | ↑ OSCC         | -     | p=0.078  | -     | -    |
|      | TNF-α                               | ↑ OSCC         | 0.749 | p=0.001  | 39%   | 100% |
| [23] | ErbB2                               | ↑ OSCC         | -     | -        | -     | -    |
|      | CEA                                 | ↑ OSCC         | -     | p<0.05   | -     | -    |
|      | Survivin                            | ↑ OSCC         | -     | p<0.05   | -     | -    |
| [48] | Glycine                             | ↓ OSCC         | -     | p<0.003  | -     | -    |

|      |              |                |      |          |      |      |
|------|--------------|----------------|------|----------|------|------|
|      | Proline      | ↓ OSCC         | -    | p<0.005  | -    | -    |
| [57] | CRP          | ↑ OSCC, ↑ OPMD | -    | p<0.005  | -    | -    |
| [58] | NAB2 mRNA    | ↓ OSCC         | 0.69 | p=0.0023 | -    | -    |
|      | CYP27A1 mRNA | ↓ OSCC         | 0.64 | p=0.0016 | -    | -    |
|      | MAOB mRNA    | ↓ OSCC         | 0.63 | P=0.0009 | -    | -    |
|      | SIAE mRNA    | ↓ OSCC         | 0.7  | 0.0370   | -    | -    |
|      | COL3A1 mRNA  | ↓ OSCC         | 0.67 | 0.0002   | -    | -    |
|      | NPIP4 mRNA   | ↓ OSCC         | 0.64 | 0.0059   | -    | -    |
| [59] | MMP-9        | ↑ OSCC         | 0.69 | 0,017    | 100% | 27 % |
| [22] | ErbB2        | ↑ OSCC         | -    | p=0.1    | -    | -    |
|      | CEA          | -              | -    | p=0.8    | -    | -    |
| [21] | LDH          | ↑ OSCC         | 0.86 | -        | 78%  | 78%  |
| [24] | CD44v        | ↑ OSCC, ↑ OPMD | 0.79 | -        | 100% | 60%  |
|      | SYNE1        | ↑ OSCC, ↑ OPMD | 0.89 | -        | 83%  | 100% |
|      | miR-34a      | ↓ OSCC         | -    | -        | -    | -    |
| [60] | S100A2       | ↑ OSCC, ↑ OPMD | 0.89 | -        | 83%  | 83%  |
|      | SLC3A2       | ↑ OSCC, ↑ OPMD | 0.89 | -        | 83%  | 83%  |
|      | IL1RN        | ↑ OSCC, ↑ OPMD | 0.89 | -        | 83%  | 83%  |
| [61] | KPNA2        | ↑ OSCC         | 0.94 | p<0.05   | -    | -    |
| [51] | EGFR         | ↑ OSCC         | 0.68 | p=0.0014 | 61%  | 69%  |
| [25] | Naa10p       | ↑ OSCC, ↑ OPMD | 0.88 | p<0.05   | -    | -    |
|      | CEA          | ↑ OSCC, ↑ OPMD | 0.85 | p<0.05   | -    | -    |
| [32] | IL-1β        | ↑ OSCC         | -    | p=0.049  | -    | -    |
|      | IP-10        | ↑ OSCC         | -    | p=0.047  | -    | -    |
|      | MIP-1β       | ↑ OSCC         | -    | p=0.033  | -    | -    |
|      | VEGF         | ↑ OSCC         | -    | p=0.014  | -    | -    |
|      | IL-6         | ↑ OSCC         | -    | p=0.005  | -    | -    |
|      | IFN-γ        | ↑ OSCC         | -    | p=0.036  | -    | -    |

|      |                         |        |        |           |   |   |
|------|-------------------------|--------|--------|-----------|---|---|
|      | IL-5                    | ↑ OSCC | -      | p=0.048   | - | - |
|      | IL-8                    | ↑ OSCC | -      | p=0.004   | - | - |
| [62] | L-fructose              | ↑ OSCC | -      | P<0.0005  | - | - |
| [50] | CYFRA 21-1              | ↑ OSCC | -      | p=0.001   | - | - |
| [33] | IL-17A                  | ↑ OSCC | -      | P< 0.001  | - | - |
|      | IL-17F                  | ↑ OSCC | -      | p<0.01    | - | - |
|      | TNF- $\alpha$           | ↑ OSCC | -      | p<0.01    | - | - |
| [64] | MMP1                    | ↑ OSCC | 0.914  | p <0.0001 | - | - |
|      | PADI1                   | ↓ OSCC | 0.827  | p <0.0001 | - | - |
|      | TNC                     | ↑ OSCC | 0.813  | p <0.0001 | - | - |
|      | CSTA                    | ↓ OSCC | 0.77   | p <0.0001 | - | - |
|      | MMP3                    | ↑ OSCC | 0.753  | p <0.0001 | - | - |
| [36] | ANG                     | ↑ OSCC | -      | p=0.15    | - | - |
|      | ANG2                    | ↑ OSCC | -      | p=0.74    | - | - |
|      | HGF                     | ↑ OSCC | -      | p=0.22    | - | - |
|      | PIGF                    | ↑ OSCC | -      | p=0.089   | - | - |
|      | VEGF                    | ↑ OSCC | -      | p=0.97    | - | - |
|      | MMP1                    | ↑ OSCC | -      | p=0.35    | - | - |
|      | MMP2                    | ↑ OSCC | -      | p=0.83    | - | - |
|      | MMP3                    | ↑ OSCC | -      | p=0.28    | - | - |
|      | MMP8                    | ↑ OSCC | -      | p=0.1     | - | - |
|      | TIMP1                   | ↑ OSCC | -      | p=0.0063  | - | - |
|      | TIMP2                   | ↑ OSCC | -      | p=0.0063  | - | - |
| [38] | PBSA                    | ↑ OSCC | -      | P < 0.05  | - | - |
|      | FSA                     | ↑ OSCC | -      | P < 0.05  | - | - |
| [42] | miR-24-3p               | ↑ OSCC | 0.738  | P=0.02    | - | - |
| [31] | LGALS 3bp0              | ↑ OSCC | 0.7296 | p=0.0008  | - | - |
|      | IL 1 $\beta$            | ↑ OSCC | 0.9017 | p < 0.05  | - | - |
|      | IL-8                    | ↑ OSCC | 0.9017 | p < 0.05  | - | - |
| [65] | $\beta$ 2-microglobulin | ↑ OSCC | -      | P = 0.042 | - | - |

|      |                 |                |       |          |       |      |
|------|-----------------|----------------|-------|----------|-------|------|
| [66] | Cathepsin B     | ↑ OSCC         | -     | p< 0.001 | -     | -    |
| [37] | NUS1            | -              | -     | p=0.037  | 68.3% | 70%  |
|      | RCN1            | -              | -     | p=0.011  | 68.3% | 90%  |
| [67] | CD44            | ↑ OSCC         | 0.7   | p=0.007  | 91%   | 54%  |
|      | S100A7          | ↑ OSCC         | 0.7   | p=0.0296 | 81%   | 72%  |
|      | S100P           | ↑ OSCC         | 0.7   | p=0.0296 | 81%   | 72%  |
| [68] | MMP13           | ↑ OSCC         | -     | -        | -     | -    |
| [14] | MMP9            | ↑ OSCC, ↑ OPMD | 0.917 | P<0.001  | 100%  | 59%  |
| [69] | 8-OHdG          | -              |       | <0.0001  | -     | -    |
| [70] | miR-30c-5p      | ↑ OSCC         | 0,89  | <0.001   | 80%   | 86%% |
| [71] | KLK5            | ↑ OSCC         | 0.853 | <0.001   | 80%   | 77%  |
|      | uPA             | ↑ OSCC         | 0.821 | <0.001   | 80%   | 73%  |
| [26] | IL-8            | ↑ OSCC         | 0.842 | <0.0001  | 76%   | 92%  |
|      | IL-1 $\alpha$   | ↑ OSCC         | 0.770 | <0.001   | 67%   | 92%  |
|      | IL-6            | ↑ OSCC         | 0.921 | <0.0001  | 82%   | 96%  |
|      | TNF- $\alpha$   | ↑ OSCC         | 0.953 | <0.0001  | 86%   | 100% |
|      | IP-10           | ↓ OSCC         | 0.740 | <0.001   | 64%   | 80%  |
| [72] | LDH             | ↑ OSCC, ↑ OPMD | 0,85  | <0.001   | 76%   | 80%  |
| [40] | miR- let -7a-5p | ↓ OSCC         | 0,81  | < 0.001  | 81%   | 73%  |
|      | miR- 3928       | ↓ OSCC         |       | < 0.001  | 81%   | 73%  |

AUC = Area under the curve; Sens = Sensitivity; Spec = Specificity.
